# Supplementary material for: Orientation and stretching of supracolloidal chains of diblock copolymer micelles by spin-coating process
Source: Royal Society of Chemistry journal article supplement (doi:10.1039/d4nr00663a), 2024-01-01
Supplement: d4nr00663a1.pdf [file d4nr00663a1.pdf]

**Supplementary Material**

**Orientation and Stretching of Supracolloidal Chains  
of Diblock Copolymer Micelles  
by Spin-coating Process**

*Jaemin Kim, Kyunghyeon Lee, Sangyoon Kim, and Byeong-Hyeok Sohn\**

Department of Chemistry, Seoul National University, Seoul 08826, Republic of Korea

\*Corresponding Author. E-mail address: bhsohn@snu.ac.kr

Tel: 82-2-883-2154 Fax: 82-2-889-1568

|                  | Persistence length (nm) |             |
|------------------|-------------------------|-------------|
|                  | Drop                    | Spin        |
| 1,000 ~ 1,500 nm | 438 ± 9                 | 493 ± 11    |
| 1,500 ~ 2,000 nm | 451 ± 7                 | 511 ± 12    |
| 2,000 ~ 2,500 nm | 462 ± 10                | 548 ± 11    |
| 2,500 ~ 3,000 nm | 535 ± 8                 | 624 ± 11    |
| 3,000 ~ 3,500 nm | 460 ± 5                 | 1,187 ± 60  |
| 3,500 ~ 4,000 nm | 601 ± 10                | 1,663 ± 108 |
| 4,000 ~ 4,500 nm | 409 ± 12                | 1,783 ± 100 |
| 4,500 ~ 5,000 nm | 323 ± 49                | 1,451 ± 75  |
| > 5,000 nm       | 545 ± 11                | 1,593 ± 82  |

**Table S1.** Mean values with deviations of persistence lengths in the graph of Figure 7b. The deviation value is the 95% confidence interval, which equals to 1.96 times the standard deviation.

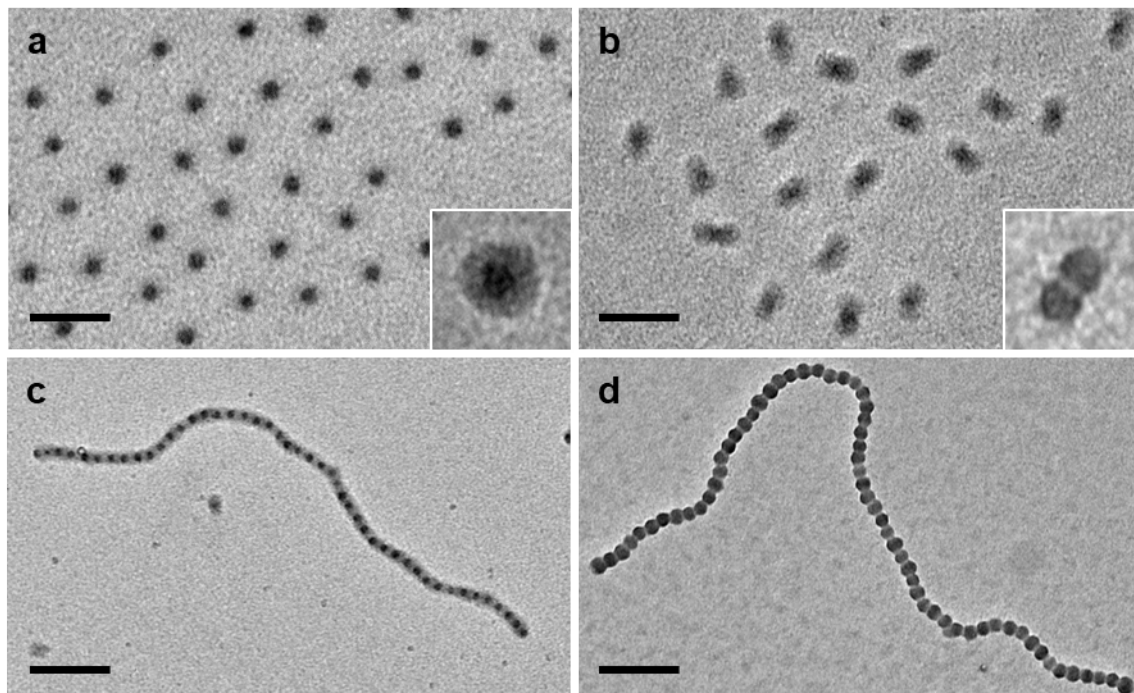

**Figure S1.** TEM images: (a) spherical micelles; (b) patchy micelles; (c) a supracolloidal chain; (d) a supracolloidal chain stained with RuO<sub>4</sub>. The scale bars in (a)(b) and (c)(d) are 100 nm and 200 nm, respectively. Each inset shows an enlarged image of an individual micelle (100 nm × 100 nm), where the PS block was selectively stained with RuO<sub>4</sub>.

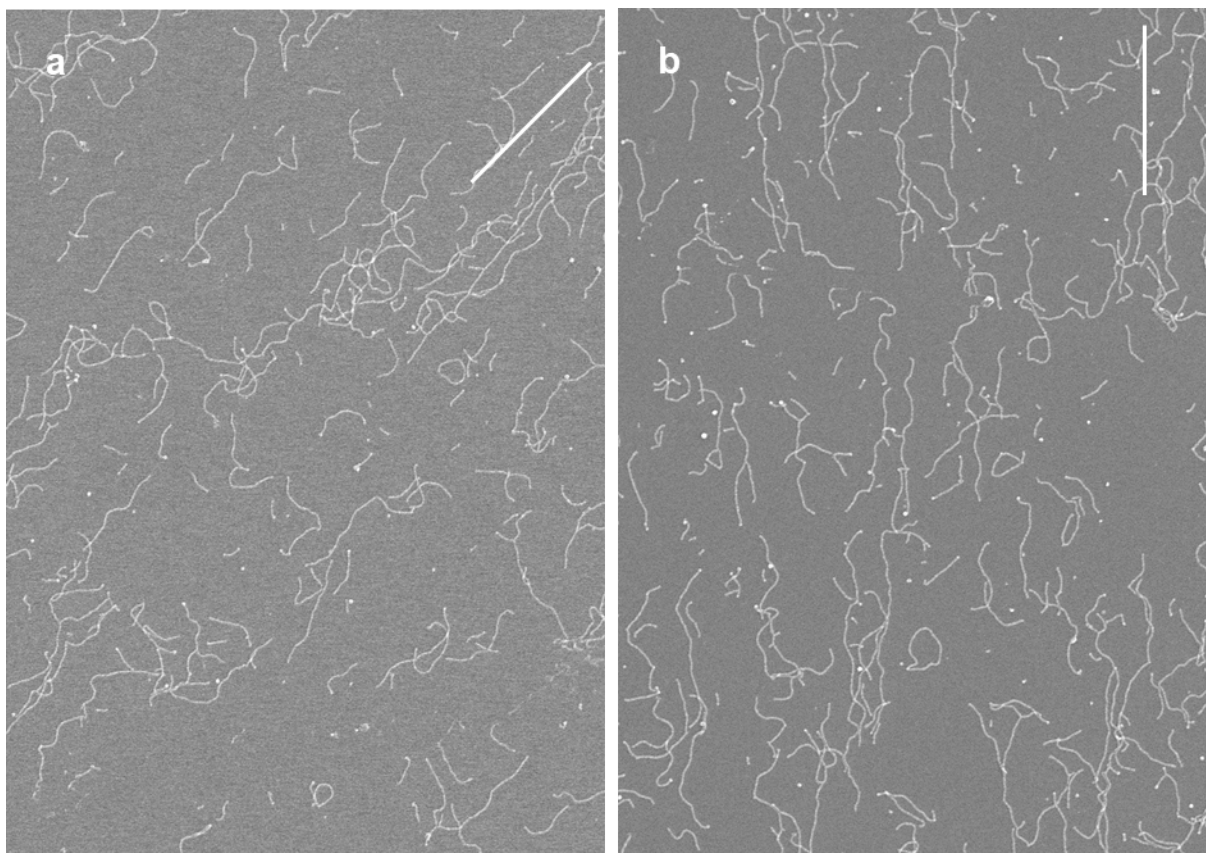

**Figure S2.** SEM images of supracolloidal chains spin-coated on a substrate. The images in (a) and (b) were obtained at 45° and 90° directions from the center of the substrate, respectively. The size of each image is 12  $\mu\text{m}$   $\times$  17  $\mu\text{m}$ . The radial direction of the spin-coating process is indicated by the white line.

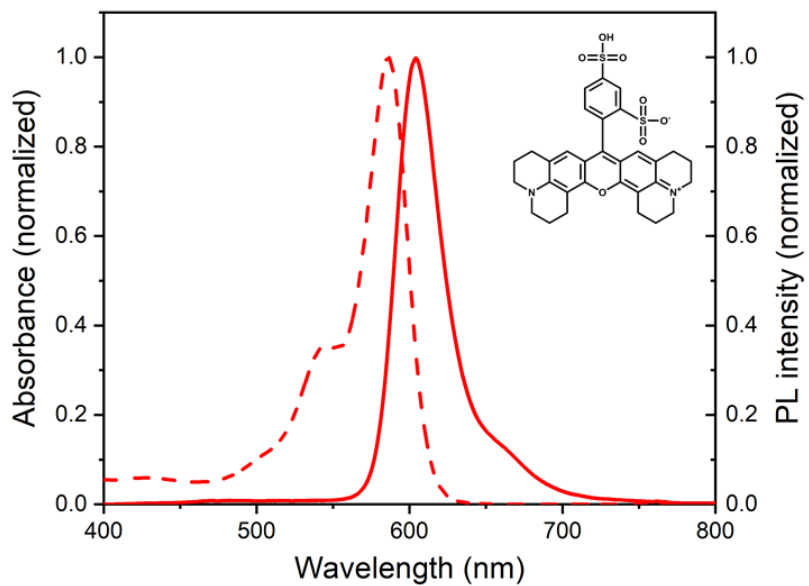

**Figure S3.** Absorption (dashed) and PL (solid) spectra of Sulforhodamine 101 in water. The excitation wavelength was 365 nm.

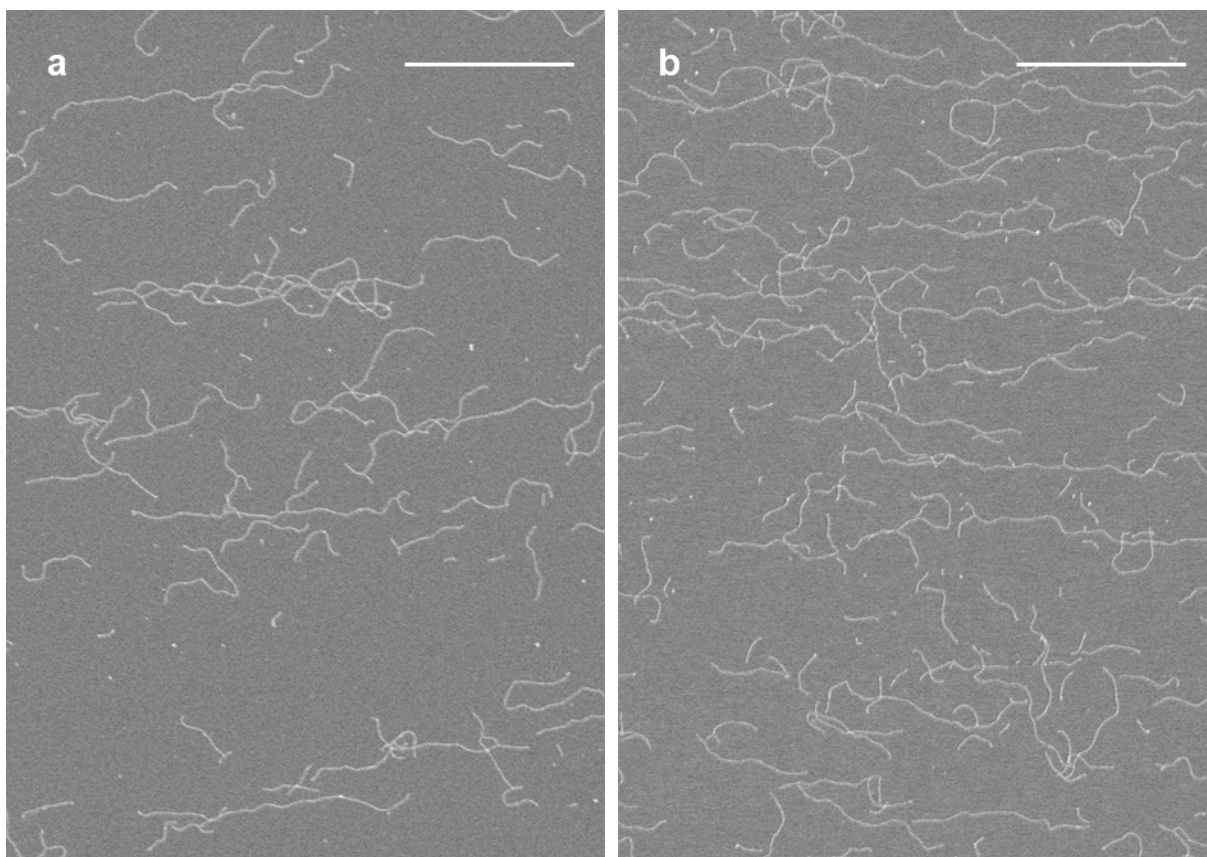

**Figure S4.** SEM images of supracolloidal chains spin-coated on a substrate by varying the initial concentration: (a) 0.02 wt%; (b) 0.03 wt%. The size of each image is  $12\ \mu\text{m} \times 17\ \mu\text{m}$ . The radial direction of the spin-coating process is indicated by the white line.

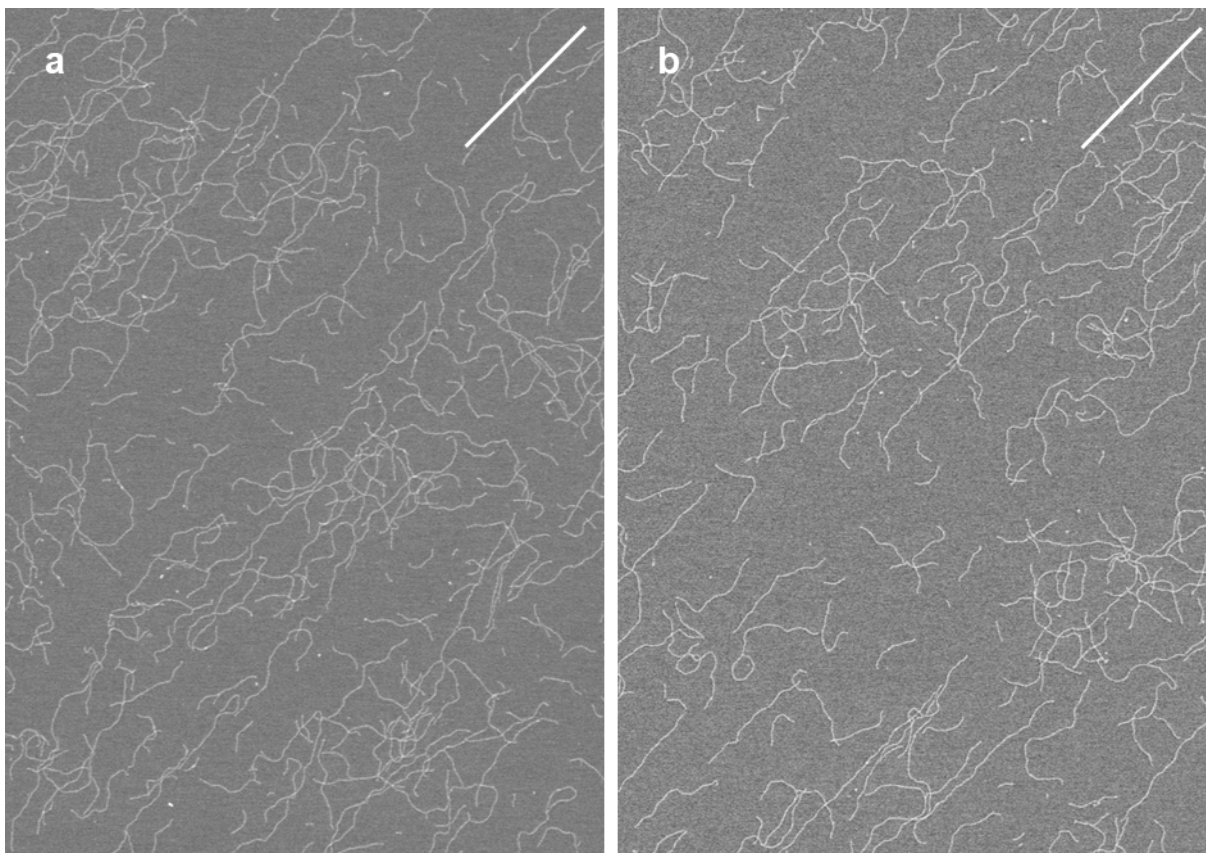

**Figure S5.** SEM images of supracolloidal chains spin-coated on a substrate by varying the spinning speeds: (a) 1,500 rpm; (b) 4,500 rpm. The size of each image is  $12\ \mu\text{m} \times 17\ \mu\text{m}$ . The radial direction of the spin-coating process is indicated by the white line.

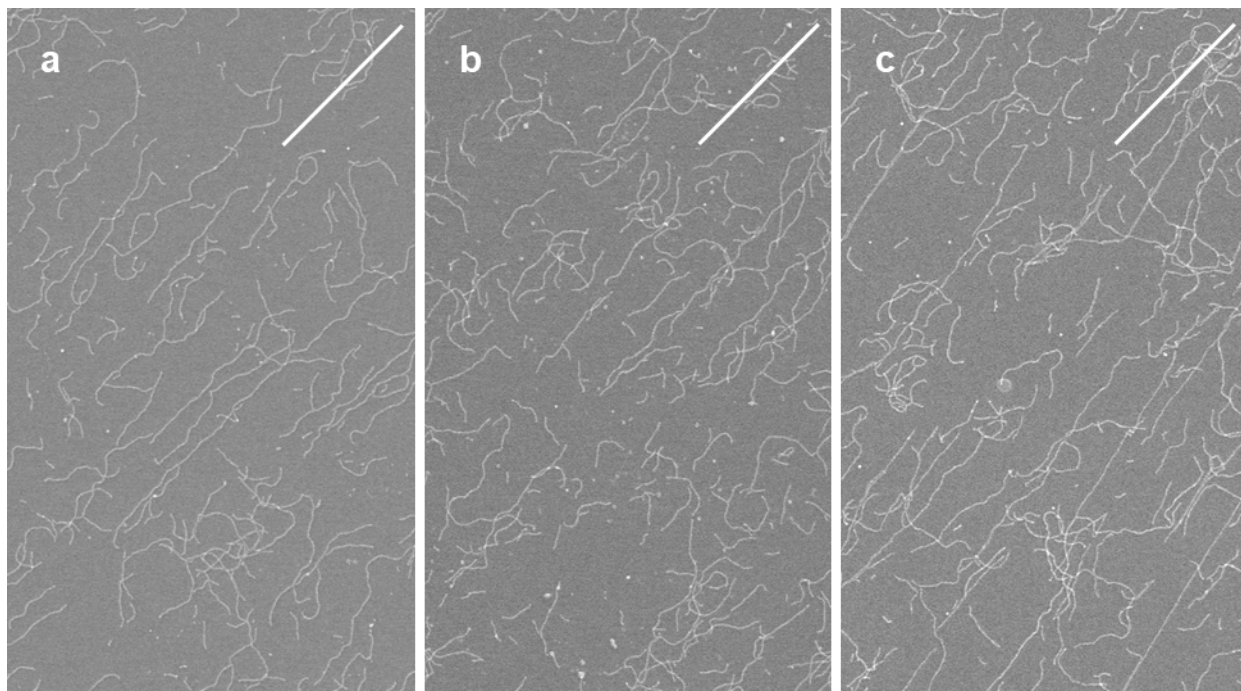

**Figure S6.** SEM images of supracolloidal chains spin-coated on substrates with various water-contact angles: (a) 35°; (b) 70°; 110°. The size of each image is 12  $\mu\text{m}$   $\times$  17  $\mu\text{m}$ . The radial direction of the spin-coating process is indicated by the white line.

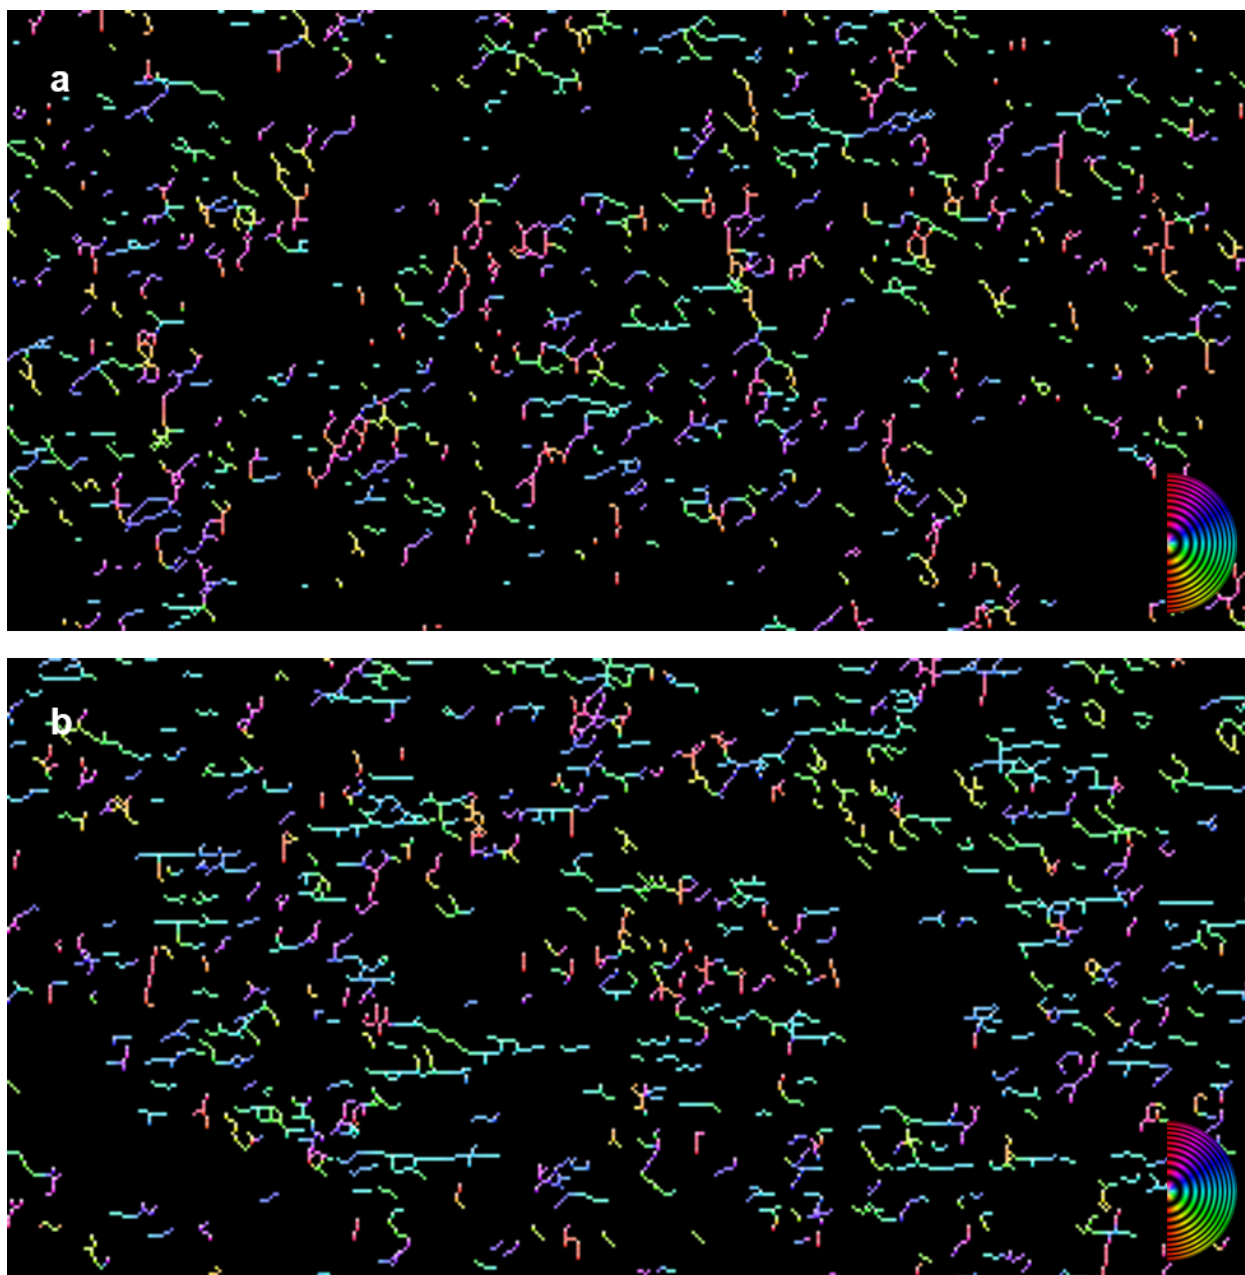

**Figure S7.** Images of color-coded chains with respect to their orientation corresponding to fluorescent images in Figure 9: (a) drop-cast; (b) spin-coated. The size of each image is the same as that in Figure 9 ( $100\ \mu\text{m} \times 50\ \mu\text{m}$ ).
